# Supplementary material
Source: PubMed Central journal article supplement (PMC4282557)
Supplement: embj0033-2798-sd2.pdf [file embj0033-2798-sd2.pdf]

Table S1. Myh6-Drp1KO mice were born at normal Mendelian frequency

|                     | WT | Het | KO |
|---------------------|----|-----|----|
| Expected (%)        | 50 | 25  | 25 |
| Actual (%)          | 50 | 22  | 28 |
| Actual ( <i>n</i> ) | 57 | 25  | 32 |

A total of 114 pups from 19 litters were analyzed at P0 or P1.

Myh6-Cre:Drp1<sup>+/*flox*</sup> mice were crossed to Drp1<sup>*flox/flox*</sup> mice.

WT, Drp1<sup>+/*flox*</sup> and Drp1<sup>*flox/flox*</sup>; Het, Myh6-Cre::Drp1<sup>+/*flox*</sup>; KO, Myh6-Cre::Drp1<sup>*flox/flox*</sup>.

Table S2. Echocardiographic analysis

| <b>P1</b>    | WT           | Het          | KO           |                         |
|--------------|--------------|--------------|--------------|-------------------------|
| <i>n</i>     | 9            | 8            | 6            |                         |
| LVEDD (mm)   | 1.40 ± 0.06  | 1.44 ± 0.04  | 1.71 ± 0.05  | ** KO vs WT and Het     |
| LVESD (mm)   | 0.52 ± 0.02  | 0.54 ± 0.02  | 0.83 ± 0.07  | *** KO vs WT and Het    |
| IVSD (mm)    | 0.38 ± 0.01  | 0.39 ± 0.01  | 0.40 ± 0.03  | ns                      |
| PWTEd (mm)   | 0.36 ± 0.01  | 0.35 ± 0.02  | 0.34 ± 0.02  | ns                      |
| FS(%)        | 62.74 ± 0.81 | 62.42 ± 1.09 | 51.62 ± 3.83 | ** KO vs WT and Het     |
| EF(%)        | 86.06 ± 0.60 | 85.79 ± 0.80 | 75.86 ± 3.75 | ** KO vs WT and Het     |
| LV mass (mg) | 7.65 ± 0.65  | 8.04 ± 0.48  | 10.59 ± 0.81 | * KO vs WT and Het      |
| RWT          | 0.52 ± 0.04  | 0.49 ± 0.03  | 0.40 ± 0.03  | ns                      |
| HR (b/min)   | 383 ± 12.9   | 373 ± 17.4   | 288 ± 8.3    | *** KO vs WT, ** vs Het |

| <b>P7</b>    | WT           | Het          | KO           |                         |
|--------------|--------------|--------------|--------------|-------------------------|
| <i>n</i>     | 6            | 7            | 5            |                         |
| LVEDD (mm)   | 1.91 ± 0.08  | 2.07 ± 0.08  | 2.24 ± 0.16  | ns                      |
| LVESD (mm)   | 0.71 ± 0.04  | 0.75 ± 0.03  | 1.31 ± 0.18  | ** KO vs WT and Het     |
| IVSD (mm)    | 0.48 ± 0.01  | 0.46 ± 0.02  | 0.51 ± 0.03  | ns                      |
| PWTEd (mm)   | 0.45 ± 0.01  | 0.45 ± 0.02  | 0.48 ± 0.02  | ns                      |
| FS(%)        | 62.89 ± 0.56 | 63.69 ± 0.66 | 42.39 ± 5.20 | *** KO vs WT and Het    |
| EF(%)        | 86.21 ± 0.42 | 86.79 ± 0.49 | 65.73 ± 5.65 | *** KO vs WT and Het    |
| LV mass (mg) | 17.59 ± 2.04 | 19.05 ± 1.07 | 25.69 ± 5.12 | ns                      |
| RWT          | 0.48 ± 0.01  | 0.44 ± 0.03  | 0.43 ± 0.02  | ns                      |
| HR (b/min)   | 523 ± 21.1   | 474 ± 19.6   | 362 ± 16.6   | *** KO vs WT, ** vs Het |

Values are mean ± SEM.

*n*, number of animals analyzed.

\*  $p < 0.05$ , \*\*  $p < 0.01$ , \*\*\*  $p < 0.001$ , ns: not significant (ANOVA followed by Turkey *post hoc* test)

No significant differences were observed between WT and Het.

LVEDD, left ventricular end-diastolic dimension; LVESD, left ventricular end-systolic dimension; IVSD, inter-ventricular septum thickness diastol; PWTEd, posterior wall thickness end-diastol; FS, fractional shortening; EF, ejection fraction; LV mass, left ventricular mass; RWT, relative wall thickness; HR, heart rate

Table S3. Echocardiographic analysis for WT, Myh6-Drp1KO, ParkinKO and Parkin::Myh6-Drp1KO mice

|              | WT           | Drp1KO       | ParkinKO     | ParkinDrp1KO | WT vs Drp1 | WT vs Parkin | Drp1 vs ParkinDrp1 |
|--------------|--------------|--------------|--------------|--------------|------------|--------------|--------------------|
| <i>n</i>     | 18           | 12           | 14           | 3            |            |              |                    |
| LVEDD (mm)   | 1.91 ± 0.04  | 2.19 ± 0.07  | 1.84 ± 0.07  | 1.98 ± 0.14  | ***        | ns           | ns                 |
| LVESD (mm)   | 0.79 ± 0.03  | 1.22 ± 0.10  | 0.90 ± 0.06  | 1.38 ± 0.13  | ***        | ns           | ns                 |
| IVSD (mm)    | 0.52 ± 0.01  | 0.51 ± 0.01  | 0.51 ± 0.01  | 0.49 ± 0.02  | ns         | ns           | ns                 |
| PWTED (mm)   | 0.48 ± 0.01  | 0.50 ± 0.01  | 0.50 ± 0.02  | 0.42 ± 0.05  | ns         | ns           | ns                 |
| FS(%)        | 59.02 ± 1.25 | 45.12 ± 3.20 | 51.65 ± 2.32 | 30.21 ± 5.54 | ***        | ns           | *                  |
| EF(%)        | 82.94 ± 1.10 | 68.76 ± 3.60 | 75.92 ± 2.30 | 50.67 ± 7.51 | ***        | ns           | **                 |
| LV mass (mg) | 19.26 ± 1.15 | 24.68 ± 2.16 | 18.41 ± 1.17 | 17.50 ± 1.18 | ns         | ns           | ns                 |
| RWT          | 0.50 ± 0.01  | 0.46 ± 0.01  | 0.55 ± 0.03  | 0.43 ± 0.08  | ns         | ns           | ns                 |
| HR (b/min)   | 513 ± 11     | 397 ± 12     | 507 ± 13     | 284 ± 22     | ***        | ns           | **                 |

Values are mean ± SEM.

*n*, number of animals analyzed.

\* p<0.05, \*\*p<0.01, \*\*\* p<0.001, ns: not significant (ANOVA followed by Turkey *post hoc* test)

No significant differences were observed between WT and Parkin KO.

LVEDD, left ventricular end-diastolic dimension; LVESD, left ventricular end-systolic dimension; IVSD, inter-ventricular septum thickness diastol; PWTED, posterior wall thickness end-diastol; FS, fractional shortening; EF, ejection fraction; LV mass, left ventricular mass; RWT, relative wall thickness; HR, heart rate
